# Supplementary material
Source: publisher figshare collection journal article supplement (https://gsajournals.figshare.com/ndownloader/files/30677822)
Supplement: Supplementary file 1 [file 30677822]

| Genotype | Period length (hours) | Period length std. dev. | Avg. power of rhythmicity | # of rhythmic flies | Total number of flies tested (n) |
| --- | --- | --- | --- | --- | --- |
| *w1118* | 23.40 | 0.33 | 107.97 | 31 | 31 |
| *per01* | 23.41 | 2.33 | 37.50 | 23 | 100 |
| *tim-Gal4 > +* | 24.21 | 0.31 | 77.43 | 109 | 129 |
| *UAS-Nab2IR* | 23.55 | 0.30 | 158.13 | 30 | 31 |
| *UAS-Atx2IR* | 23.63 | 0.30 | 96.77 | 30 | 31 |
| *tim-Gal4 > UAS-Nab2IR* | 24.17 | 0.36 | 99.16 | 118 | 119 |
| *tim-Gal4 > UAS-Atx2IR* | 24.07 | 0.29 | 45.48 | 3 | 73 |
| *tim-Gal4 > UAS-Nab2IR + UAS-Atx2IR* | 25.25 | 0.97 | 30.50 | 15 | 40 |

**Table S2.** Effects of Nab2 and Atx2 RNAi depletion in *timeless*-expressing circadian neurons.
